# Supplementary material for: Graphite nanoparticle addition to fertilizers reduces nitrate leaching in growth of lettuce (Lactuca sativa)
Source: Royal Society of Chemistry journal article supplement (doi:10.1039/c9en00890j), 2019-10-21
Supplement: c9en00890j1.pdf [file c9en00890j1.pdf]

## Supplemental Information

### Graphite Nanoparticle Addition to Fertilizers Reduces Nitrate Leaching in Growth of Lettuce

*(Lactuca sativa)*

Madelyn Pandorf<sup>a</sup>, Leila Pourzahedi<sup>b</sup>, Leanne Gilbertson<sup>c,d</sup>, Gregory V. Lowry<sup>b</sup>, Pierre Herckes<sup>e</sup>, and Paul Westerhoff<sup>a,\*</sup>

<sup>a</sup>School of Sustainable Engineering and the Built Environment (SSEBE)  
Arizona State University  
P.O. Box 873005, Tempe, Arizona, 85287, USA

<sup>b</sup>Civil and Environmental Engineering Department  
Carnegie Mellon University  
5000 Forbes Avenue, Pittsburgh, Pennsylvania 15213, USA

<sup>c</sup>Department of Civil and Environmental Engineering  
University of Pittsburgh  
Pittsburgh, Pennsylvania 15261, USA

<sup>d</sup>Department of Chemical and Petroleum Engineering  
University of Pittsburgh  
Pittsburgh, Pennsylvania 15261, USA

<sup>e</sup> School of Molecular Sciences  
Arizona State University  
P.O. Box 871604, Tempe, Arizona, 85287-1604, USA

\*Corresponding author.  
Tel.: 1480-965-2885  
E-mail addresses p.westerhoff@asu.edu

### Fertilizer Treatments

The required amount of nutrients per treatment (six pots for trial 1 and four pots for trials 2 and 3) were dissolved into tap water and then sonicated and stirred on a stir plate for 30 minutes each. The dissolved nutrient solution was then constantly stirred to maintain homogeneity and distributed into centrifuge tubes on a per pot basis. The contents of the centrifuge tubes were poured onto the soil surface of each pot. The tube was rinsed with water to remove any residual nutrients/CNPs and added to the pots. The nutrients were split into two doses over the growing period, with one dose applied when seeds were planted and one dose mid-way through the growing period.

### Nutrient Balance Calculations

The initial N values for the trial 1 growing season were calculated by summing the initial amount of nitrogen in the soil and the amount of nitrogen added from fertilization. Soil data was only collected for the trial 1 experiment and, therefore, is only applicable to the trial 1 nutrient balance. Trials 2 and 3 were only partial nutrient balances because only leachate and plant tissue were considered. The initial N values for the trial 2 and trial 3 growing seasons were calculated based on the amount of nitrogen added from fertilizer. Part A: Initial N is the average amount of nitrogen applied through fertilizer, and found naturally in the soil (trial 1 only). Part A: Post-Harvest is the average N content in the leachate, plant tissue, and post-harvest soil. Table S13 Part B is the percent of the total nitrogen within leachate, plant tissue, and soil at the end of the harvest. This was calculated by separately dividing the total nitrogen of the leachate, plant tissue, and soil by the initial amount of nitrogen. Subsequently, the percentage of added nitrogen from fertilizer was then calculated for leachate and plant tissue in Part C of Table S13 and Part B of Tables S15 and S18. The values in Table S13 Part C and Table S15 and S18 Part B represent how much of the nitrogen applied from fertilization ended up in the leachate and plant tissue. The plant tissue percentages represent the efficiency of nitrogen uptake for each treatment. Table S13 Part C and Table S15 and S18 Part B was calculated using Equation 1 by subtracting the no treatment data from the fertilizer treatment data then dividing by the total amount of nitrogen applied from fertilizer for each treatment.

Equation 1 
$$\text{Mass or Percent of applied } N = \frac{N - N_o}{TF}$$

*N*: amount of nitrogen in the leachate or plant tissue, *N<sub>o</sub>*: amount of nitrogen in the no fertilizer (NT) leachate or NT plant tissue, *TF*: total amount of nitrogen added from fertilizer

**Table S1.** The cultivation period and experiment goal for each season.

| Season  | Start Date                                           | Harvest Date      | Experiment Goal                  |
|---------|------------------------------------------------------|-------------------|----------------------------------|
| Trial 1 | June 13, 2017                                        | August 3, 2017    | Vary fertilizer dose             |
| Trial 2 | September 8, 2017                                    | November 29, 2017 | Vary fertilizer dose             |
| Trial 3 | January 19, 2018<br>Transplanted<br>February 9, 2018 | April 10, 2018    | Vary soil hydraulic conductivity |

**Table S2:** Average monthly temperature (°F) and relative humidity (%) inside the greenhouse for all growing periods.

| Month     | Temperature (°F) | Relative Humidity (%) |
|-----------|------------------|-----------------------|
| June      | 26.1             | 31.5                  |
| July      | 26.2             | 45.8                  |
| September | 24.7             | 37.8                  |
| October   | 24.3             | 33.3                  |
| November  | 23.6             | 39.7                  |
| February  | 23.5             | 30.3                  |
| March     | 22.4             | 28.6                  |
| April     | 24.6             | 28.6                  |

**Table S3.** Summary of initial soil composition before planting. All nutrients are in mg/kg, cation exchange capacity (CEC) is in meq/100 g, and  $k_{sat}$  is in m/s.

| Soil Type       | P    | K   | Mg  | Ca   | Zn   | Mn   | Cu   | Fe | B    | TKN  | NO <sub>3</sub> | pH   | CEC  | $k_{sat}$            | Organic Matter |
|-----------------|------|-----|-----|------|------|------|------|----|------|------|-----------------|------|------|----------------------|----------------|
| AZ <sup>1</sup> | 60.5 | 484 | 361 | 5210 | 3.50 | 159  | 3.35 | 40 | 2.93 | 1000 | 6.0             | 8.40 | 31.5 | 4.6x10 <sup>-6</sup> | 0.54%          |
| 30S             | 66.0 | 484 | 401 | 5300 | 3.80 | 177  | 3.55 | 42 | 3.10 | 600  | 25              | 8.50 | 32.7 | 5.2x10 <sup>-6</sup> |                |
| 70S             | 54.0 | 176 | 253 | 2350 | 1.45 | 73.0 | 1.50 | 41 | 1.25 | 400  | 12              | 8.90 | 15.1 | 3.4x10 <sup>-5</sup> |                |

<sup>1</sup>Organic matter was only measured for the Arizona soil sample

**Table S4.** Analytical methods summary.

| Analyte    | Matrix   | Method                    | Instrument      | Lab                                         |
|------------|----------|---------------------------|-----------------|---------------------------------------------|
| Nitrate    | Leachate | EPA 300.1                 | Dionex ICS-5000 | Arizona State University                    |
| Phosphate  | Leachate | EPA 300.1                 | Dionex ICS-5000 | Arizona State University                    |
| Chloride   | Leachate | EPA 300.1                 | Dionex ICS-5000 | Arizona State University                    |
| Sulfate    | Leachate | EPA 300.1                 | Dionex ICS-5000 | Arizona State University                    |
| Sodium     | Leachate | ASTM D6919-19             | Dionex ICS-5000 | Arizona State University                    |
| Ammonium   | Leachate | ASTM D6919-19             | Dionex ICS-5000 | Arizona State University                    |
| Potassium  | Leachate | ASTM D6919-19             | Dionex ICS-5000 | Arizona State University                    |
| Magnesium  | Leachate | ASTM D6919-19             | Dionex ICS-5000 | Arizona State University                    |
| Calcium    | Leachate | ASTM D6919-19             | Dionex ICS-5000 | Arizona State University                    |
| Phosphorus | Soil     | Mehlich 3 acid extraction | iCAP TQ ICP-MS  | Waters Agricultural Labs Inc<br>Camilla, GA |

|            |              |                               |                            |                                             |
|------------|--------------|-------------------------------|----------------------------|---------------------------------------------|
| Zinc       | Soil         | Mehlich 3 acid extraction     | iCAP TQ ICP-MS             | Waters Agricultural Labs Inc<br>Camilla, GA |
| Manganese  | Soil         | Mehlich 3 acid extraction     | iCAP TQ ICP-MS             | Waters Agricultural Labs Inc<br>Camilla, GA |
| Potassium  | Soil         | Mehlich 3 acid extraction     | iCAP TQ ICP-MS             | Waters Agricultural Labs Inc<br>Camilla, GA |
| Magnesium  | Soil         | Mehlich 3 acid extraction     | iCAP TQ ICP-MS             | Waters Agricultural Labs Inc<br>Camilla, GA |
| Calcium    | Soil         | Mehlich 3 acid extraction     | iCAP TQ ICP-MS             | Waters Agricultural Labs Inc<br>Camilla, GA |
| TKN        | Soil         |                               |                            | Waters Agricultural Labs Inc<br>Camilla, GA |
| Nitrate    | Soil         | KCl-Cadmium Reduction         | Flow injection analysis    | Waters Agricultural Labs Inc<br>Camilla, GA |
| pH         | Soil         |                               | Hydrogen probe             | Waters Agricultural Labs Inc<br>Camilla, GA |
| CEC        | Soil         |                               |                            | Waters Agricultural Labs Inc<br>Camilla, GA |
| TN         | Plant tissue |                               | LECO Nitrogen Gas analyzer | Waters Agricultural Labs Inc<br>Camilla, GA |
| Phosphorus | Plant tissue | Wet digestion Digi Block 3000 | iCAP TQ ICP-MS             | Waters Agricultural Labs Inc<br>Camilla, GA |
| Potassium  | Plant tissue | Wet digestion Digi Block 3000 | iCAP TQ ICP-MS             | Waters Agricultural Labs Inc<br>Camilla, GA |
| Magnesium  | Plant tissue | Wet digestion Digi Block 3000 | iCAP TQ ICP-MS             | Waters Agricultural Labs Inc<br>Camilla, GA |
| Calcium    | Plant tissue | Wet digestion Digi Block 3000 | iCAP TQ ICP-MS             | Waters Agricultural Labs Inc<br>Camilla, GA |

|        |              |                                     |                    |                                                |
|--------|--------------|-------------------------------------|--------------------|------------------------------------------------|
| Sulfur | Plant tissue | Wet digestion<br>Digi Block<br>3000 | iCAP TQ ICP-<br>MS | Waters Agricultural<br>Labs Inc<br>Camilla, GA |
| Boron  | Plant tissue | Wet digestion<br>Digi Block<br>3000 | iCAP TQ ICP-<br>MS | Waters Agricultural<br>Labs Inc<br>Camilla, GA |
| Zinc   | Plant tissue | Wet digestion<br>Digi Block<br>3000 | iCAP TQ ICP-<br>MS | Waters Agricultural<br>Labs Inc<br>Camilla, GA |

**Table S5** Surface charge of CNP using zeta potential at pH 4, 7, and 10

| pH | Zeta Potential (mV) |
|----|---------------------|
| 4  | -23.9               |
| 7  | -36.7               |
| 10 | -36.7               |

**Table S6.** Average lettuce leaf yield for the *trial 1* growing season.

| Treatment | Average Yield (kg/ha) | Average Yield (g/pot) |
|-----------|-----------------------|-----------------------|
| NT        | 4,710 ± 2,983         | 19.3 ± 12             |
| CNP       | 1,949 ± 1,053         | 8.00 ± 4.3            |
| 100       | 39,471 ± 9,697        | 162 ± 40              |
| 100+CNP   | 40,283 ± 10,856       | 165 ± 45              |
| 70+CNP    | 38,171 ± 3,690        | 157 ± 15              |

**Table S7.** Average lettuce leaf yield for the *trial 2* growing season. Due to germination issues, some trial 2 treatments had only two replicates indicated by the \* symbol.

| Treatment | Average Yield (kg/ha) | Average Yield (g/pot) |
|-----------|-----------------------|-----------------------|
| NT        | 6,335 ± 1,289         | 26.0 ± 5.3            |
| CNP       | 9,989 ± 4,331         | 41.0 ± 18             |
| 100*      | 38,740 ± 2,412        | 159 ± 9.9             |
| 100+CNP   | 22,090 ± 7,570        | 90.7 ± 31             |
| 70        | 25,989 ± 7,184        | 107 ± 30              |
| 70+CNP*   | 30,456 ± 3,101        | 125 ± 13              |
| 50        | 20,141 ± 7,050        | 83.0 ± 29             |
| 50+CNP    | 12,507 ± 7,877        | 51.0 ± 32             |
| 30        | 15,350 ± 7,491        | 63.0 ± 31             |

**Table S8.** Combined average lettuce leaf yield for the *trial 1* and *trial 2* growing seasons for statistical analysis.

| Treatment | Average Yield (kg/ha) | Statistical Relationships for $p>0.10$ |
|-----------|-----------------------|----------------------------------------|
| NT        | 5,252 ± 2,576         | b                                      |
| CNP       | 5,969 ± 5,195         | b                                      |
| 100       | 39,227 ± 7,598        | a                                      |
| 100+CNP   | 31,187 ± 13,013       | a                                      |
| 70        | 25,989 ± 7,184        | a                                      |
| 70+CNP    | 35,085 ± 5,203        | a                                      |
| 50        | 20,141 ± 7,050        | a                                      |
| 50+CNP    | 12,507 ± 7,877        | ab                                     |
| 30        | 15,350 ± 7,491        | ab                                     |

**Table S9.** Average lettuce leaf yield for the *trial 3* growing season. Yields followed by the same superscript letter indicate no statistical difference ( $p>0.10$ ).

| Treatment  | Average Yield (kg/ha)       | Average Yield (g/pot) |
|------------|-----------------------------|-----------------------|
| NT AZ      | 2,680 ± 1,014 <sup>b</sup>  | 11.0 ± 4.2            |
| NT 30S     | 2,558 ± 613 <sup>b</sup>    | 10.5 ± 2.5            |
| NT 70S     | 393 ± 103 <sup>a</sup>      | 1.61 ± 0.42           |
| CNP AZ     | 4,142 ± 281 <sup>bc</sup>   | 17.0 ± 1.2            |
| CNP 30S    | 2,924 ± 487 <sup>b</sup>    | 12.0 ± 2.0            |
| CNP 70S    | 454 ± 66 <sup>a</sup>       | 1.86 ± 0.27           |
| 30 AZ      | 11,573 ± 3,500 <sup>d</sup> | 47.5 ± 14             |
| 30+CNP AZ  | 11,695 ± 4,340 <sup>d</sup> | 48.0 ± 18             |
| 30 30S     | 11,533 ± 4,528 <sup>d</sup> | 47.3 ± 19             |
| 30+CNP 30S | 14,253 ± 1,924 <sup>d</sup> | 58.5 ± 7.9            |
| 30 70S     | 8,771 ± 3,732 <sup>cd</sup> | 36.0 ± 15             |
| 30+CNP 70S | 9,502 ± 2,337 <sup>d</sup>  | 39.0 ± 9.6            |

**Table S10.** Average nutrient leached for *trial 1* experiment with one standard deviation. # of replicates that grew was out of 6 planted.

| Treatment | #<br>Replicates<br>Grown | Na<br>kg/ha | K<br>kg/ha | Ca<br>kg/ha | NO <sub>3</sub><br>kg/ha | Cl<br>kg/ha | SO <sub>4</sub><br>kg/ha |
|-----------|--------------------------|-------------|------------|-------------|--------------------------|-------------|--------------------------|
| NT        | 6                        | 223±60      | 7.1±1.8    | 63±18       | 0.87±1.1                 | 279±79      | 173±44                   |
| CNP       | 4                        | 246±21      | 9.0±0.88   | 71±13       | 0.31±0.31                | 311±37      | 165±9.1                  |
| 100       | 4                        | 130±60      | 5.0±1.9    | 65±39       | 28±17                    | 162±92      | 74±22                    |
| 100+CNP   | 3                        | 155±24      | 17±8.1     | 76±19       | 34±8.0                   | 188±28      | 93±30                    |
| 70+CNP    | 3                        | 101±37      | 4.0±0.35   | 40±20       | 11±3.0                   | 111±38      | 53±16                    |

**Table S11.** Average nutrient leached for *trial 2* experiment with one standard deviation. # of replicates that grew was out of 4 planted.

| <b>Treatment</b> | <b># Replicates Grown</b> | <b>Na</b><br>kg/ha | <b>K</b><br>kg/ha | <b>Mg</b><br>kg/ha | <b>Ca</b><br>kg/ha | <b>NO<sub>3</sub></b><br>kg/ha | <b>Cl</b><br>kg/ha | <b>SO<sub>4</sub></b><br>kg/ha |
|------------------|---------------------------|--------------------|-------------------|--------------------|--------------------|--------------------------------|--------------------|--------------------------------|
| NT               | 3                         | 175±42             | 6.9±3.2           | 17±7.4             | 54±17              | 6.09±6.0                       | 269±38             | 100±40                         |
| CNP              | 4                         | 153±89             | 5.4±3.7           | 16±8.7             | 46±26              | 5.85±9.5                       | 220±128            | 76±46                          |
| 100              | 2                         | 123±95             | 14±16             | 12±10              | 51±36              | 23.4±22                        | 197±147            | 66±55                          |
| 100+CNP          | 3                         | 222±65             | 17±3.4            | 20±3.4             | 79±5.6             | 30.5±13                        | 332±99             | 101±30                         |
| 70               | 3                         | 204±59             | 13±5.5            | 19±7.3             | 70±11              | 19.7±6.4                       | 288±72             | 102±43                         |
| 70+CNP           | 2                         | 171±12             | 13±3.5            | 20±1.5             | 50±4.5             | 10.8±2.8                       | 223±1.5            | 99±20                          |
| 50               | 3                         | 173±55             | 13±5.5            | 18±9.1             | 62±24              | 21.3±18                        | 250±78             | 89±34                          |
| 50+CNP           | 3                         | 191±93             | 12±4.1            | 17±9.4             | 51±23              | 14.6±6.9                       | 288±124            | 91±52                          |
| 30               | 4                         | 177±88             | 7.9±4.5           | 14±9.2             | 58±27              | 8.08±6.0                       | 274±132            | 89±49                          |
| 30+CNP           | 1                         | 164                | 3.2               | 14                 | 87                 | 6.5                            | 359                | 97                             |

**Table S12.** Average nutrient leached for *trial 3* experiment with one standard deviation. # of replicates that grew was out of 4 planted.

| <b>Treatment</b> | <b># Replicates Grown</b> | <b>Na</b><br>kg/ha | <b>K</b><br>kg/ha | <b>Mg</b><br>kg/ha | <b>Ca</b><br>kg/ha | <b>NO<sub>3</sub></b><br>kg/ha | <b>Cl</b><br>kg/ha | <b>SO<sub>4</sub></b><br>kg/ha |
|------------------|---------------------------|--------------------|-------------------|--------------------|--------------------|--------------------------------|--------------------|--------------------------------|
| NT AZ            | 4                         | 142±38             | 5.4±0.7           | 7.7±1.5            | 59±19              | 3.6±4.4                        | 181±47             | 90.8±33                        |
| NT 30S           | 4                         | 148±46             | 5.1±2.1           | 9.1±2.4            | 55±18              | 4.1±1.4                        | 191±57             | 83.5±33                        |
| NT 70S           | 4                         | 199±30             | 7.3±1.3           | 14±1.5             | 64±9.1             | 1.7±0.66                       | 260±32             | 102±22                         |
| CNP AZ           | 4                         | 181±28             | 7.7±1.8           | 11±3.2             | 69±9.1             | 3.1±1.5                        | 219±31             | 115±19                         |
| CNP 30S          | 3                         | 214±34             | 7.5±0.7           | 12±2.7             | 74±9.2             | 3.6±0.78                       | 265±42             | 132±20                         |
| CNP 70S          | 4                         | 218±27             | 7.0±0.9           | 13±2.4             | 65±9.5             | 1.5±0.26                       | 259±35             | 116±21                         |
| 30 AZ            | 4                         | 81±39              | 2.7±1.4           | 4.8±2.3            | 34±21              | 4.3±7.2                        | 107±51             | 47.9±25                        |
| 30+CNP AZ        | 4                         | 135±60             | 4.7±2.7           | 8.1±3.4            | 56±28              | 15±9.8                         | 165±76             | 77.0±34                        |
| 30 30S           | 3                         | 111±16             | 3.6±1.0           | 7.3±1.3            | 43±13              | 6.8±4.3                        | 140±27             | 62.5±5.4                       |
| 30+CNP 30S       | 4                         | 120±56             | 4.1±2.1           | 7.6±3.9            | 42±23              | 5.3±4.6                        | 147±66             | 72.6±38                        |
| 30 70S           | 4                         | 163±19             | 4.3±1.4           | 15±3.9             | 58±12              | 14±3.2                         | 205±33             | 80.3±11                        |
| 30+CNP 70S       | 4                         | 126±46             | 3.4±1.4           | 10±3.5             | 43±18              | 6.4±7.0                        | 171±60             | 56.7±29                        |

**Table S13.** Overall average nutrient balance between leachate, plant tissue, and soil for the *trial I* growing season. Part A is in units of average kg/ha for each treatment, and Parts B and C are percentages. The nitrogen content in the leachate, plant tissue, and post-harvest soil for each treatment totaled to 85, 83, 81, 93, 80% of the initial N available for NT, CNP, 100, 100+CNP, and 70+CNP, respectively (Table 4.12 Part B). The nitrogen mass balance was within 20% of the initial nitrogen available with losses attributed to nitrogen volatilization, microbial activity, and analytical error.

| <b>Part A.</b> Average nitrogen content found initially and post-harvest per fertilizer treatment (kg/ha)     |           |            |                |                |               |
|---------------------------------------------------------------------------------------------------------------|-----------|------------|----------------|----------------|---------------|
|                                                                                                               | <b>NT</b> | <b>CNP</b> | <b>100</b>     | <b>100+CNP</b> | <b>70+CNP</b> |
| <b>Initial N</b>                                                                                              |           |            |                |                |               |
| Fertilizer                                                                                                    | 0.00      | 0.00       | 196            | 196            | 137           |
| Soil                                                                                                          | 784       | 784        | 784            | 784            | 784           |
| <b>Post-Harvest</b>                                                                                           |           |            |                |                |               |
| Leachate                                                                                                      | 0.87      | 0.31       | 27.0           | 34.0           | 11.4          |
| Plant tissue                                                                                                  | 9.30      | 4.00       | 96.0           | 88.0           | 70.0          |
| Soil                                                                                                          | 653       | 646        | 673            | 786            | 658           |
| <b>Part B.</b> Percentage of nitrogen after harvest between leachate, plant tissue, and post-harvest soil (%) |           |            |                |                |               |
| <b>Post-Harvest</b>                                                                                           | <b>NT</b> | <b>CNP</b> | <b>100</b>     | <b>100+CNP</b> | <b>70+CNP</b> |
| Leachate                                                                                                      | 0.11      | 0.04       | 2.81           | 3.45           | 1.24          |
| Plant tissue                                                                                                  | 1.19      | 0.51       | 9.82           | 9.02           | 7.55          |
| Post- Harvest Soil                                                                                            | 83.3      | 82.3       | 68.6           | 80.2           | 71.4          |
| Total                                                                                                         | 84.6      | 82.9       | 81.3           | 92.7           | 80.2          |
| <b>Part C.</b> Percentage of added nitrogen in the leachate and plant tissue (%)                              |           |            |                |                |               |
| <b>Post-Harvest</b>                                                                                           |           | <b>100</b> | <b>100+CNP</b> | <b>70+CNP</b>  |               |
| Leachate                                                                                                      |           | 13.6       | 16.9           | 7.70           |               |
| Plant tissue                                                                                                  |           | 44.4       | 40.4           | 44.0           |               |



**Table S14.** Part A is the average *nutrient content* (kg/ha) in harvested plant tissue for *trial 1* experiment. The average is a total of the root and leaf samples for replicates within each treatment with one standard deviation. Part B is the average *concentration* (g/kg) of nutrients in the harvest lettuce leaf. # of replicates that grew was out of 6 planted.

| <b>Part A</b> | <b>#</b>         | <b>N</b> | <b>P</b>  | <b>K</b> | <b>Mg</b> | <b>Ca</b> | <b>S</b>  | <b>Zn</b>   |
|---------------|------------------|----------|-----------|----------|-----------|-----------|-----------|-------------|
| Treatment     | Replicates Grown | kg/ha    | kg/ha     | kg/ha    | kg/ha     | kg/ha     | kg/ha     | kg/ha       |
| NT            | 6                | 9.3±6.0  | 0.96±0.79 | 27±24    | 2.5±2.0   | 8.5±6.8   | 1.2±1.1   | 0.018±0.014 |
| CNP           | 4                | 4.0±1.7  | 0.32±0.14 | 12±4.9   | 0.70±0.32 | 2.6±1.1   | 0.41±0.18 | 0.005±0.002 |
| 100           | 4                | 96±29    | 16±5.6    | 236±92   | 18±6.7    | 82±48     | 14±4.1    | 0.169±0.059 |
| 100+CNP       | 3                | 88±26    | 11±6.3    | 252±178  | 21±13     | 66±42     | 12±7.0    | 0.163±0.100 |
| 70+CNP        | 3                | 70±1.8   | 20±8.1    | 373±165  | 25±7.2    | 83±14     | 20±6.9    | 0.219±0.046 |
| <b>Part B</b> |                  | <b>N</b> | <b>P</b>  | <b>K</b> | <b>Mg</b> | <b>Ca</b> | <b>S</b>  | <b>Zn</b>   |
| Treatment     |                  | g/kg     | g/kg      | g/kg     | g/kg      | g/kg      | g/kg      | g/kg        |
| NT            | 6                | 17.3     | 0.77      | 15.6     | 2.97      | 8.93      | 1.12      | 0.024       |
| CNP           | 4                | 20.4     | 1.70      | 70.4     | 3.10      | 13.7      | 2.10      | 0.020       |
| 100           | 4                | 24.0     | 3.08      | 51.2     | 2.60      | 10.8      | 2.53      | 0.026       |
| 100+CNP       | 3                | 21.6     | 0.80      | 8.00     | 3.37      | 7.60      | 1.27      | 0.026       |
| 70+CNP        | 3                | 16.3     | 1.83      | 17.3     | 3.07      | 7.30      | 1.87      | 0.028       |

**Table S15.** Overall average nutrient balance between leachate and plant tissue for the *trial 2* growing season. Part A is in units of average kg/ha for each treatment, and Parts B and C are in percentages.

| <b>Initial N</b>    | <b>Part A</b> | Average nitrogen content found initially and post-harvest per fertilizer treatment (kg/ha) |                |            |                |           |               |           |               |           |
|---------------------|---------------|--------------------------------------------------------------------------------------------|----------------|------------|----------------|-----------|---------------|-----------|---------------|-----------|
|                     | Fertilizer    | <b>NT</b>                                                                                  | <b>CNP</b>     | <b>100</b> | <b>100+CNP</b> | <b>70</b> | <b>70+CNP</b> | <b>50</b> | <b>50+CNP</b> | <b>30</b> |
| <b>Post-Harvest</b> | Leachate      | 6.10                                                                                       | 5.85           | 23.4       | 30.5           | 19.7      | 10.8          | 21.3      | 14.6          | 8.08      |
|                     | Plant tissue  | 13.5                                                                                       | 19.4           | 70.6       | 42.4           | 44.9      | 47.6          | 39.7      | 29.5          | 28.4      |
| <b>Post-Harvest</b> | <b>Part B</b> | Percentage of added nitrogen in the leachate and plant tissue (%)                          |                |            |                |           |               |           |               |           |
|                     |               | <b>100</b>                                                                                 | <b>100+CNP</b> | <b>70</b>  | <b>70+CNP</b>  | <b>50</b> | <b>50+CNP</b> | <b>30</b> |               |           |
| <b>Post-Harvest</b> | Leachate      | 8.8                                                                                        | 13             | 10         | 3              | 16        | 9             | 3         |               |           |
|                     | Plant tissue  | 29                                                                                         | 15             | 23         | 25             | 27        | 16            | 25        |               |           |

**Table S16.** Part A is the average *nutrient content* (kg/ha) in harvested plant tissue for *trial 2* experiment. The average is a total of the root and leaf samples for replicates within each treatment with one standard deviation. Part B is the average *concentration* (g/kg) of nutrients in the harvest lettuce leaf. # of replicates that grew was out of 4 planted.

| <b>Part A</b><br>Treatment | #<br>replicates<br>grown | N<br>kg/ha | P<br>kg/ha | K<br>kg/ha | Mg<br>kg/ha | Ca<br>kg/ha | S<br>kg/ha | Zn<br>kg/ha |
|----------------------------|--------------------------|------------|------------|------------|-------------|-------------|------------|-------------|
| NT                         | 3                        | 13±3.9     | 2.3±1.7    | 31±11      | 2.6±2.0     | 8.1±5.3     | 1.7±1.0    | 0.023±0.020 |
| CNP                        | 4                        | 19±6.5     | 3.3±0.86   | 45±16      | 3.7±1.6     | 13±4.2      | 2.3±0.72   | 0.037±0.014 |
| 100                        | 2                        | 71±17      | 7.4±0.74   | 161±13     | 9.0±1.5     | 30±2.7      | 7.5±1.0    | 0.105±0.012 |
| 100+CNP                    | 3                        | 42±5.2     | 4.4±0.97   | 91±20      | 5.7±1.5     | 18±3.9      | 4.2±1.0    | 0.061±0.004 |
| 70                         | 3                        | 45±6.7     | 5.1±0.94   | 105±12     | 6.5±0.08    | 26±9.7      | 4.4±0.56   | 0.068±0.003 |
| 70+CNP                     | 2                        | 48±6.1     | 5.5±0.52   | 114±17     | 6.5±0.08    | 20±1.6      | 5.3±0.73   | 0.070±0.005 |
| 50                         | 3                        | 40±11      | 4.0±1.1    | 84±20      | 4.5±1.5     | 18±7.3      | 3.3±0.96   | 0.048±0.017 |
| 50+CNP                     | 3                        | 30±21      | 3.7±2.7    | 70±50      | 5.0±4.0     | 17±12       | 3.4±2.3    | 0.049±0.037 |
| 30                         | 4                        | 28±15      | 5.4±5.1    | 111±106    | 5.4±4.8     | 21±21       | 4.3±3.7    | 0.050±0.044 |
| 30+CNP                     | 1                        | 40         | 6.8        | 124        | 9.1         | 30          | 6.4        | 0.081       |
| <b>Part B</b><br>Treatment |                          | N<br>g/kg  | P<br>g/kg  | K<br>g/kg  | Mg<br>g/kg  | Ca<br>g/kg  | S<br>g/kg  | Zn<br>g/kg  |
| NT                         | 3                        | 26.3       | 3.23       | 55.9       | 2.90        | 11.3        | 2.47       | 0.026       |
| CNP                        | 4                        | 18.5       | 2.98       | 42.8       | 2.28        | 9.03        | 1.73       | 0.026       |
| 100                        | 2                        | 34.3       | 3.45       | 78.1       | 3.35        | 12.8        | 3.15       | 0.042       |
| 100+CNP                    | 3                        | 36.6       | 3.43       | 74.7       | 3.30        | 12.9        | 3.20       | 0.039       |
| 70                         | 3                        | 32.1       | 3.63       | 80.0       | 3.23        | 16.7        | 2.97       | 0.036       |
| 70+CNP                     | 2                        | 36.6       | 3.95       | 88.3       | 3.65        | 12.5        | 3.65       | 0.042       |
| 50                         | 3                        | 36.4       | 3.63       | 81.8       | 3.43        | 12.7        | 3.23       | 0.036       |
| 50+CNP                     | 3                        | 26.9       | 2.87       | 60.1       | 2.63        | 11.1        | 2.27       | 0.028       |
| 30                         | 4                        | 27.0       | 3.23       | 68.9       | 2.80        | 11.5        | 2.45       | 0.028       |
| 30+CNP                     | 1                        | 13.6       | 2.20       | 40.8       | 2.40        | 9.7         | 1.70       | 0.023       |

**Table S17.** The average leaf yield, nitrate leached, and nitrogen in the plant tissue in kg/ha for the *trials 1 and 2* experiments.

| Treatments | Trial 1<br>Leaf<br>Yield | Trial 1<br>Nitrate<br>Leached | Trial 1<br>Nitrogen<br>in Leaf<br>Tissue | Trial 2<br>Leaf<br>Yield | Trial 2<br>Nitrate<br>Leached | Trial 2<br>Nitrogen<br>in Leaf<br>Tissue | Average<br>Trial<br>1+2<br>Leaf<br>Yield | Average<br>Trial<br>1+2<br>Nitrate<br>Leached | Average<br>Trial<br>1+2<br>Nitrogen<br>in Leaf<br>Tissue |
|------------|--------------------------|-------------------------------|------------------------------------------|--------------------------|-------------------------------|------------------------------------------|------------------------------------------|-----------------------------------------------|----------------------------------------------------------|
|            | kg/ha                    | kg/ha                         | kg/ha                                    | kg/ha                    | kg/ha                         | kg/ha                                    | kg/ha                                    | kg/ha                                         | kg/ha                                                    |
| NT         | 4,710                    | 0.87                          | 9.33                                     | 6,335                    | 6.09                          | 13.5                                     | 5,252                                    | 2.61                                          | 10.7                                                     |
| CNP        | 1,949                    | 0.31                          | 4.00                                     | 9,989                    | 5.85                          | 19.4                                     | 5,969                                    | 3.08                                          | 11.7                                                     |
| 100        | 39,471                   | 27.5                          | 96.2                                     | 38,740                   | 23.4                          | 70.6                                     | 39,227                                   | 26.1                                          | 87.7                                                     |
| 100+CNP    | 40,283                   | 33.8                          | 88.4                                     | 22,090                   | 30.5                          | 42.4                                     | 31,187                                   | 32.2                                          | 65.4                                                     |
| 70         |                          |                               |                                          | 25,989                   | 19.7                          | 44.9                                     | 25,989                                   | 19.7                                          | 44.9                                                     |
| 70+CNP     | 38,171                   | 11.4                          | 69.6                                     | 30,456                   | 10.8                          | 47.6                                     | 35,085                                   | 11.2                                          | 60.8                                                     |
| 50         |                          |                               |                                          | 20,141                   | 21.3                          | 39.7                                     | 20,141                                   | 21.3                                          | 39.7                                                     |
| 50+CNP     |                          |                               |                                          | 12,507                   | 14.6                          | 29.5                                     | 12,507                                   | 14.6                                          | 29.5                                                     |
| 30         |                          |                               |                                          | 15,350                   | 8.08                          | 28.4                                     | 15,350                                   | 8.08                                          | 28.4                                                     |

**Table S18.** Average nutrient balance between leachate and plant tissue for the *trial 3* growing season. Part A is in units of average kg/ha for each treatment and Part B is in percentages.

|                     | <b>Part A Average nitrogen content initially &amp; post-harvest per fertilizer treatment (kg/ha)</b> |          |           |           |           |            |            |          |                  |           |                   |           |                       |
|---------------------|------------------------------------------------------------------------------------------------------|----------|-----------|-----------|-----------|------------|------------|----------|------------------|-----------|-------------------|-----------|-----------------------|
|                     |                                                                                                      | NT<br>AZ | NT<br>30S | NT<br>70S | CNP<br>AZ | CNP<br>30S | CNP<br>70S | 30<br>AZ | 30+<br>CNP<br>AZ | 30<br>30S | 30+<br>CNP<br>30S | 30<br>70S | 30+<br>CN<br>P<br>70S |
| <b>Initial N</b>    | Fertilizer                                                                                           | 0        | 0         | 0         | 0         | 0          | 0          | 59       | 59               | 59        | 59                | 59        | 59                    |
| <b>Post-Harvest</b> | Leachate                                                                                             | 3.6      | 4.1       | 1.4       | 3.1       | 3.6        | 1.5        | 4.3      | 15               | 6.8       | 5.3               | 14        | 6.4                   |
|                     | Plant tissue                                                                                         | 7.6      | 6.2       | 1.2       | 12        | 7.3        | 1.7        | 34       | 37               | 30        | 38                | 28        | 30                    |
| <b>Post-Harvest</b> | <b>Part B Percentage of added nitrogen in the leachate and plant tissue (%)</b>                      |          |           |           |           |            |            |          |                  |           |                   |           |                       |
|                     | Leachate                                                                                             |          |           |           |           |            |            | 1.2      | 19               | 4.7       | 2.2               | 22        | 8.5                   |
|                     | Plant tissue                                                                                         |          |           |           |           |            |            | 44       | 50               | 40        | 54                | 45        | 50                    |

**Table S19.** Part A is the average nutrient content in harvested plant tissue for *trial 3* experiment. The average is a total of the root and leaf samples for replicates within each treatment with one standard deviation. Part B is the average concentration of nutrients in the harvest lettuce leaf. # of replicates that grew was out of 4 planted.

| <b>Part A</b> |                          | <b>N</b> | <b>P</b>  | <b>K</b> | <b>Mg</b> | <b>Ca</b> | <b>S</b>  | <b>Zn</b>   |
|---------------|--------------------------|----------|-----------|----------|-----------|-----------|-----------|-------------|
| Treatment     | #<br>Replicates<br>Grown | kg/ha    | kg/ha     | kg/ha    | kg/ha     | kg/ha     | kg/ha     | kg/ha       |
| NT AZ         | 4                        | 7.6±1.3  | 0.70±0.11 | 15±2.80  | 0.99±0.18 | 2.8±0.58  | 0.79±0.13 | 0.007±0.001 |
| NT 30S        | 4                        | 6.2±1.3  | 0.60±0.18 | 13±3.39  | 0.98±0.24 | 2.8±0.77  | 0.69±0.15 | 0.006±0.002 |
| NT 70S        | 4                        | 1.2±0.61 | 0.13±0.07 | 2.6±1.38 | 0.22±0.12 | 0.53±0.28 | 0.12±0.06 | 0.001±0.001 |
| CNP AZ        | 4                        | 12±1.3   | 0.86±0.17 | 21±2.44  | 1.3±0.25  | 4.1±0.74  | 0.98±0.16 | 0.01±0.001  |
| CNP 30S       | 3                        | 7.3±0.81 | 0.72±0.08 | 15±2.37  | 1.1±0.15  | 3.3±0.33  | 0.78±0.09 | 0.007±0.001 |
| CNP 70S       | 4                        | 1.7±0.51 | 0.22±0.07 | 3.9±1.09 | 0.32±0.09 | 0.82±0.25 | 0.20±0.06 | 0.002±0.001 |
| 30 AZ         | 4                        | 34±9.4   | 2.2±0.47  | 59±13.9  | 4.1±1.3   | 13±4.6    | 3.1±1.0   | 0.03±0.01   |
| 30+CNP AZ     | 4                        | 37±11    | 2.3±0.76  | 63±21.8  | 4.5±2.1   | 14±8.1    | 3.2±1.1   | 0.03±0.01   |
| 30 30S        | 3                        | 30±11    | 2.2±0.85  | 58±22.0  | 4.7±2.2   | 13±6.1    | 2.7±1.1   | 0.03±0.02   |
| 30+CNP 30S    | 4                        | 38±3.6   | 3.0±0.23  | 71±4.43  | 5.2±0.92  | 16±2.9    | 3.4±0.48  | 0.04±0.01   |
| 30 70S        | 4                        | 28±6.4   | 1.5±0.62  | 39±17.4  | 3.4±1.3   | 8.5±3.5   | 2.0±0.78  | 0.02±0.01   |
| 30+CNP 70S    | 4                        | 30±7.8   | 1.7±0.43  | 47±8.40  | 4.1±1.3   | 10±2.9    | 2.2±0.57  | 0.02±0.01   |
| <b>Part B</b> |                          | <b>N</b> | <b>P</b>  | <b>K</b> | <b>Mg</b> | <b>Ca</b> | <b>S</b>  | <b>Zn</b>   |
| Treatment     | #                        | g/kg     | g/kg      | g/kg     | g/kg      | g/kg      | g/kg      | g/kg        |
| NT AZ         | 4                        | 20.8     | 1.60      | 35.7     | 1.65      | 7.15      | 1.60      | 0.013       |
| NT 30S        | 4                        | 14.4     | 1.20      | 25.3     | 1.38      | 5.93      | 1.23      | 0.009       |
| NT 70S        | 4                        | 13.9     | 1.50      | 26.0     | 1.90      | 6.40      | 1.20      | 0.010       |
| CNP AZ        | 4                        | 22.3     | 1.38      | 34.6     | 1.58      | 7.18      | 1.50      | 0.012       |
| CNP 30S       | 3                        | 16.0     | 1.43      | 29.4     | 1.63      | 6.97      | 1.30      | 0.009       |
| CNP 70S       | 4                        | 11.5     | 1.50      | 22.1     | 1.60      | 5.80      | 1.10      | 0.009       |
| 30 AZ         | 4                        | 21.3     | 1.28      | 37.2     | 1.53      | 7.30      | 1.53      | 0.012       |
| 30+CNP AZ     | 4                        | 25.5     | 1.28      | 38.8     | 1.83      | 7.90      | 1.68      | 0.014       |
| 30 30S        | 3                        | 18.8     | 1.23      | 35.6     | 1.73      | 7.00      | 1.40      | 0.011       |
| 30+CNP 30S    | 4                        | 19.3     | 1.30      | 34.1     | 1.68      | 7.13      | 1.28      | 0.013       |
| 30 70S        | 4                        | 15.6     | 0.85      | 22.2     | 1.50      | 5.38      | 1.05      | 0.007       |
| 30+CNP 70S    | 4                        | 17.9     | 0.95      | 26.5     | 1.65      | 6.00      | 1.18      | 0.010       |

**Table S20.** The average leaf yield, nitrate leached, and nitrogen in the plant tissue in kg/ha for the *trial 3* experiment.

| <b>Treatment</b> | <b>Leaf Yield<br/>(kg/ha)</b> | <b>Nitrate Leached<br/>(kg/ha)</b> | <b>Nitrogen in Leaf Tissue<br/>(kg/ha)</b> |
|------------------|-------------------------------|------------------------------------|--------------------------------------------|
| NT AZ            | 2,680                         | 3.60                               | 7.60                                       |
| NT 30S           | 2,558                         | 4.10                               | 6.20                                       |
| NT 70S           | 393                           | 1.40                               | 1.20                                       |
| CNP AZ           | 4,142                         | 3.10                               | 12.0                                       |
| CNP 30S          | 2,924                         | 3.60                               | 7.30                                       |
| CNP 70S          | 454                           | 1.50                               | 1.70                                       |
| 30 AZ            | 11,573                        | 4.30                               | 34.0                                       |
| 30+CNP AZ        | 11,695                        | 15.5                               | 37.0                                       |
| 30 30S           | 11,533                        | 6.80                               | 30.0                                       |
| 30+CNP 30S       | 14,253                        | 5.30                               | 38.0                                       |
| 30 70S           | 8,771                         | 14.0                               | 28.0                                       |
| 30+CNP 70S       | 9,502                         | 6.40                               | 30.0                                       |

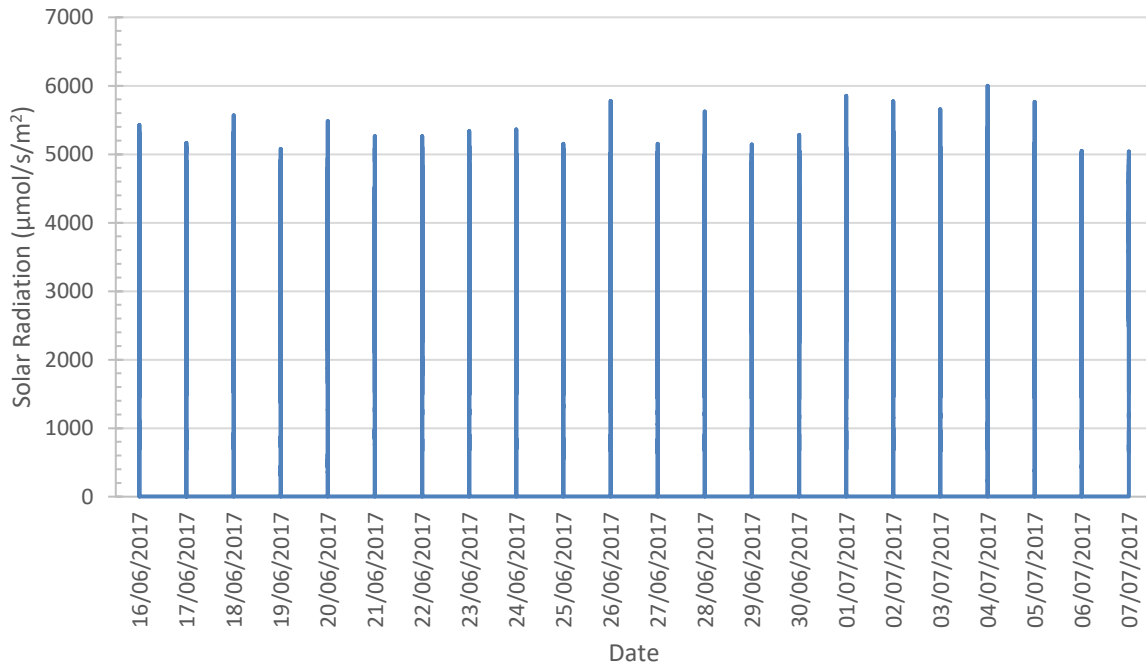

**Figure S1.** Photosynthetically active radiation (PAR) data for the *trial 1* experiment from sensor in greenhouse.

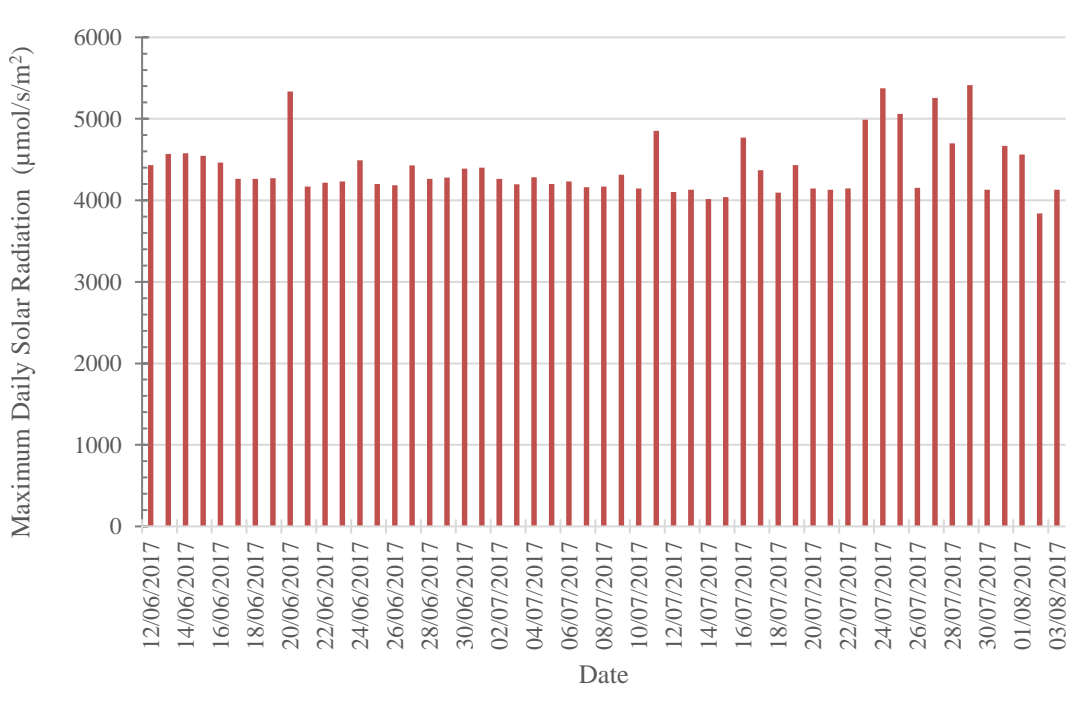

**Figure S2.** Solar radiation data for the *trial 1* experiment from Tempe Town Lake weather station to supplement missing PAR data in Figure S1.

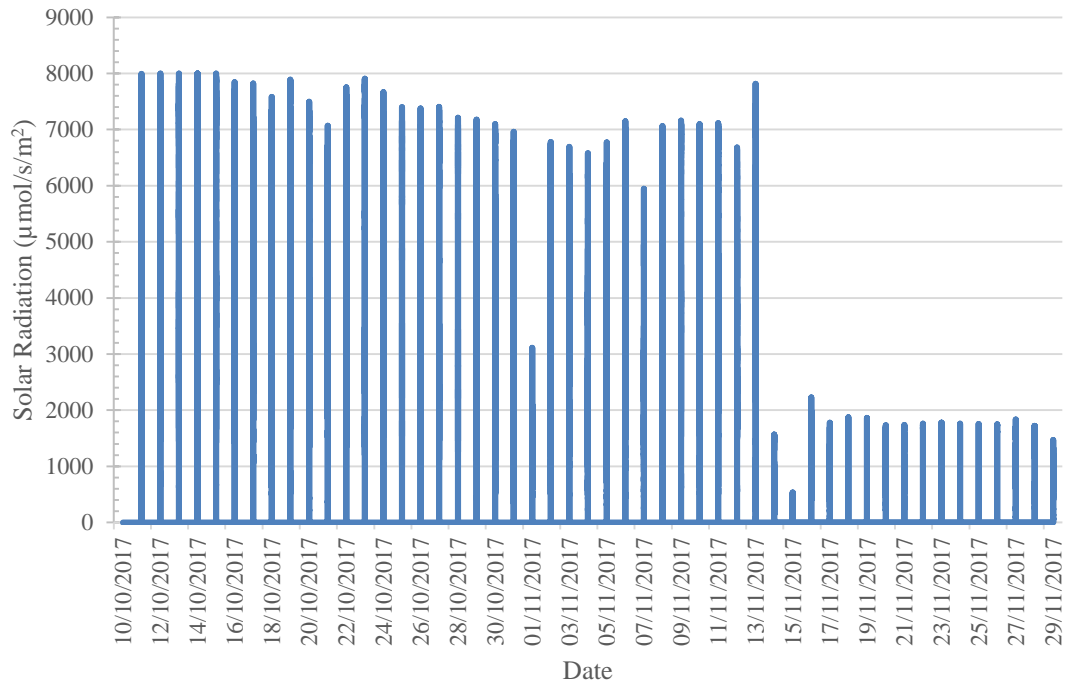

**Figure S3.** PAR data for the *trial 2* experiment from sensor in greenhouse.

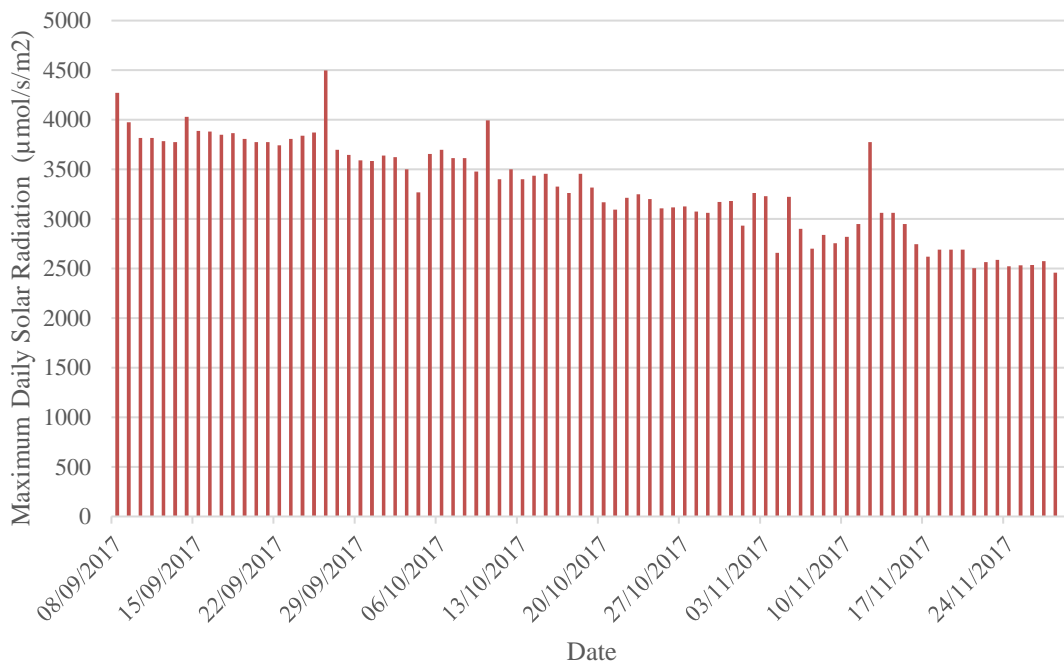

**Figure S4.** Solar radiation data for the *trial 2* experiment from Tempe Town Lake weather station to supplement missing PAR data in Figure S3.

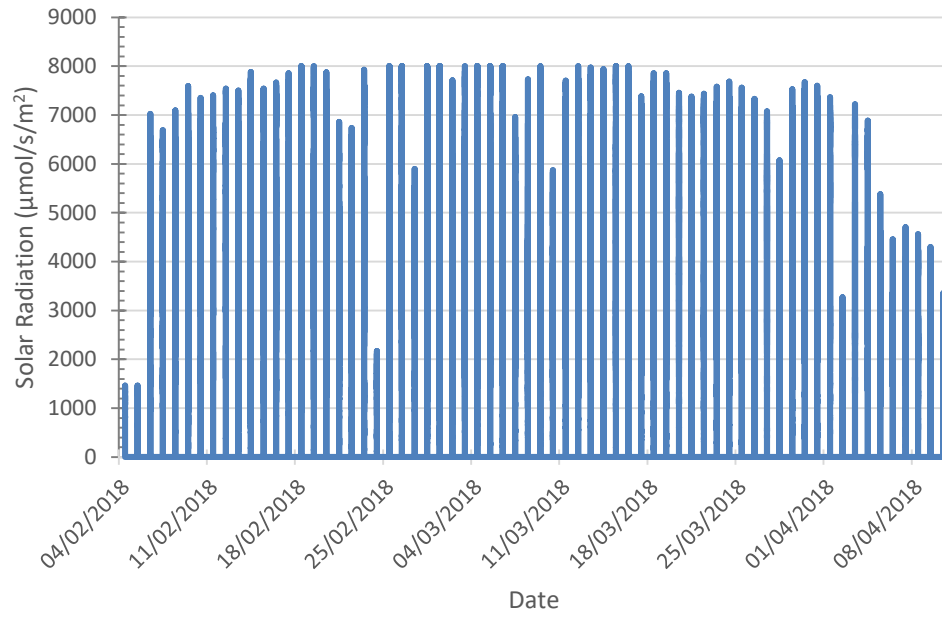

**Figure S5.** PAR data for the *trial 3* experiment from sensor in greenhouse.

### Randomized complete block design

Microsoft Excel was used to randomize the treatments within each block by assigning each treatment a letter and random number (using the random number function) and then sorting the numbers and assigning each treatment to a row within the block (Grant, 2010).

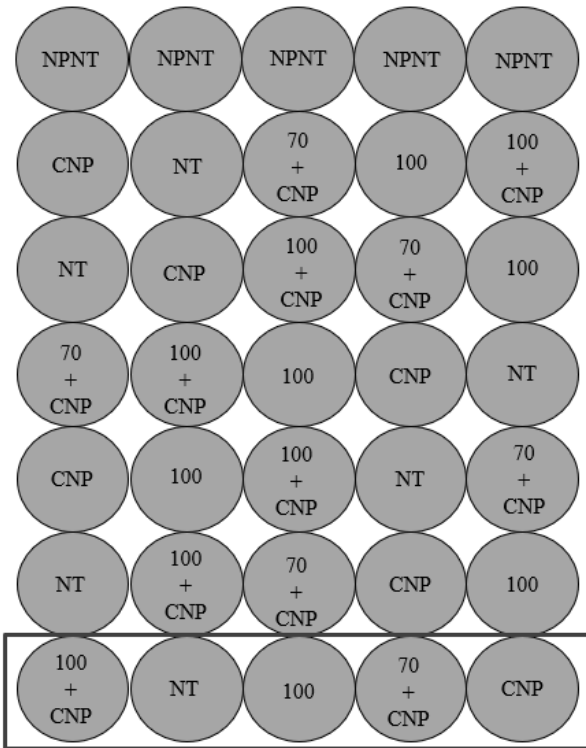

#### Treatments:

- NT: No treatment
- CNP: Carbon nanoparticle only
- 100: 100% of recommended NPK only
- 100+CNP: 100% of NPK combined with carbon nanoparticles (CNP)
- 70+CNP: 70% of NPK and CNP
- NPNT: No plant and no treatment

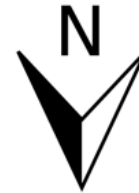

**Figure S6.** Trial 1 treatment pot configuration. The Randomized Complete Block Design is oriented as rows from left to right, meaning that each row contains one replicate of each treatment. The NPNT pots contained soil that was only irrigated to ensure irrigation standards were met.



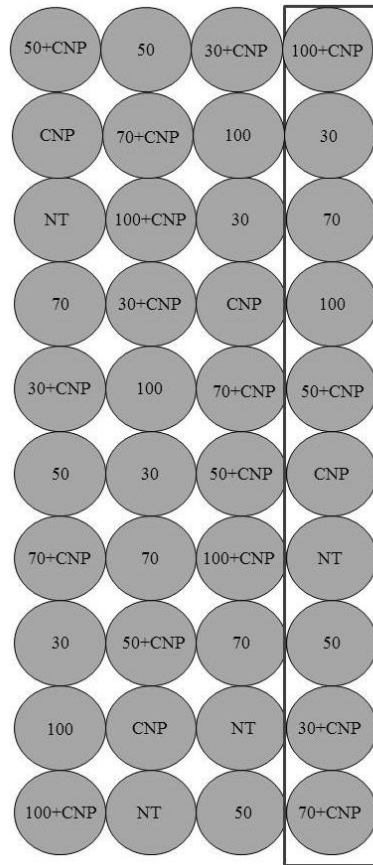

Treatments:

- NT: no treatment
- CNP: full dose of CNP only
- 100+CNP: 100% of recommended NPK combined with carbon nanoparticles (CNP)
- 100: 100% of NPK only
- 70+CNP: 70% of NPK and CNP
- 70: 70% NPK only
- 50+CNP: 50% of NPK and CNP
- 50: 50% NPK only
- 30+CNP: 30% NPK and CNP
- 30: 30% NPK only

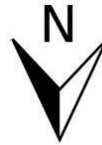

**Figure S7.** Trial 2 treatment pot configuration. The Randomized Complete Block Design is oriented as vertical columns, meaning that each column contains one replicate of each treatment.

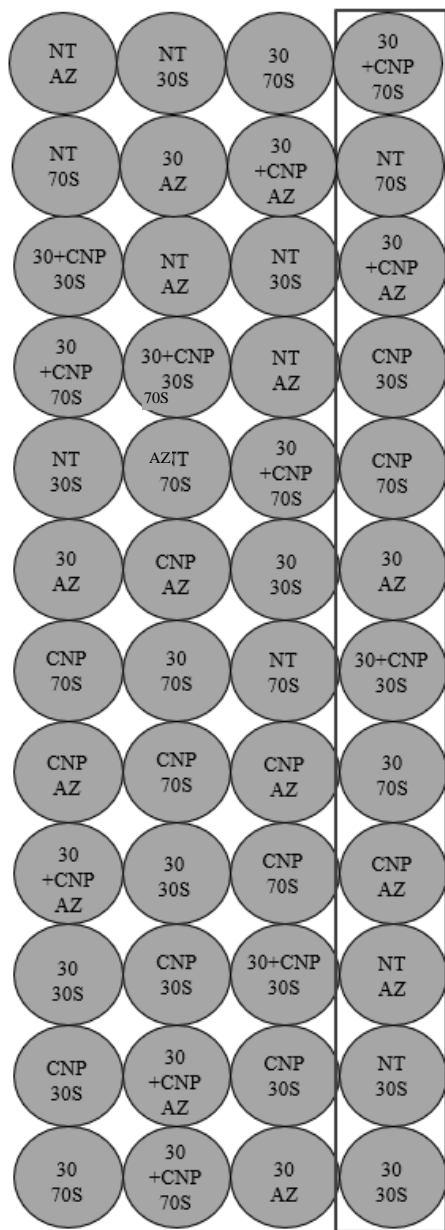

Treatments:

- NT AZ: no treatment in Arizona soil
- NT 30S: no treatment in Arizona soil blended with 30% sand
- NT 70S: no treatment in Arizona soil blended with 70% sand
- CNP AZ: carbon nanoparticles only in Arizona soil
- CNP 30S: carbon nanoparticles only in Arizona soil blended with 30% sand
- CNP 70S: carbon nanoparticles only in Arizona soil blended with 70% sand
- 30-AZ: 30% NPK in Arizona soil
- 30-30S: 30% NPK in Arizona soil blended with 30% sand
- 30-70S: 30% NPK in Arizona soil blended with 70% sand
- 30+CNP AZ: 30% NPK with carbon nanoparticles in Arizona soil
- 30+CNP 30S: 30% NPK with carbon nanoparticles in Arizona soil blended with 30% sand
- 30+CNP 70S: 30% NPK with carbon nanoparticles in Arizona soil blended with 70% sand

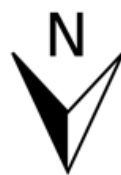

**Figure S8.** Trial 3 treatment pot configuration. The Randomized Complete Block Design is oriented as vertical columns, meaning that each column contains one replicate of each treatment.

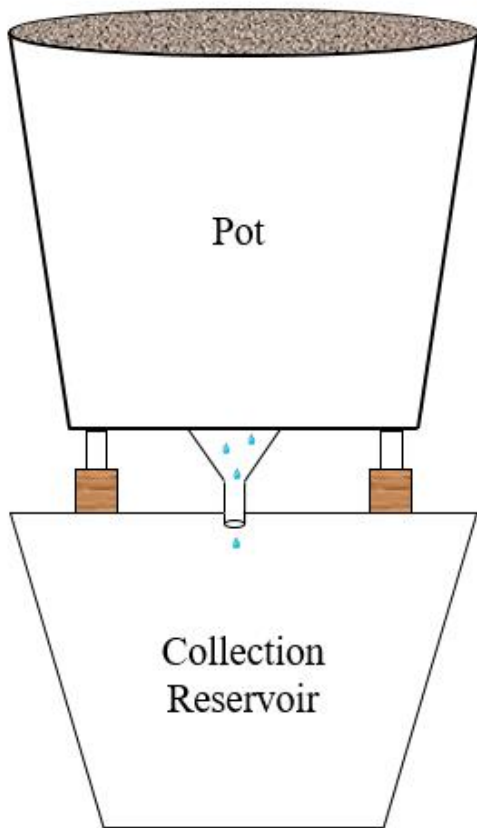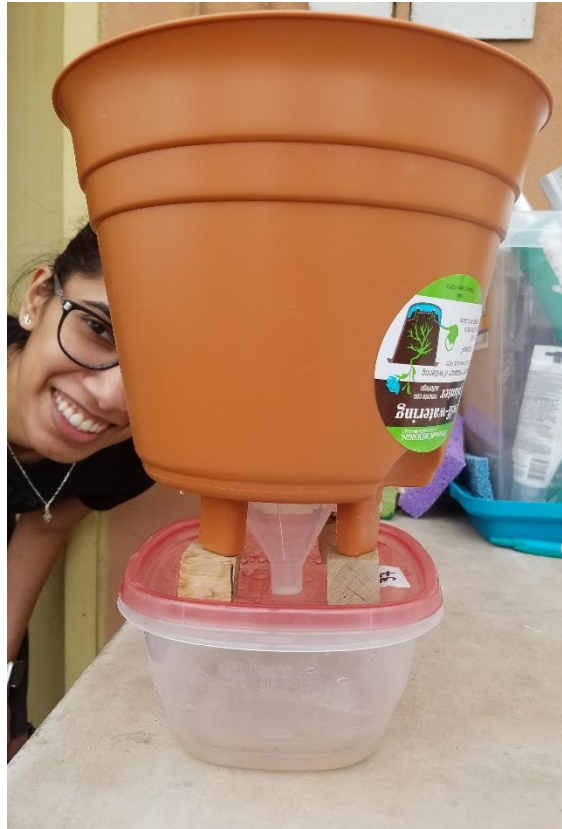

**Figure S9.** Leachate Collection Setup. The water flows from the pot through the funnel into the collection reservoir. The pot is elevated on wooden blocks to provide enough room for the funnel.

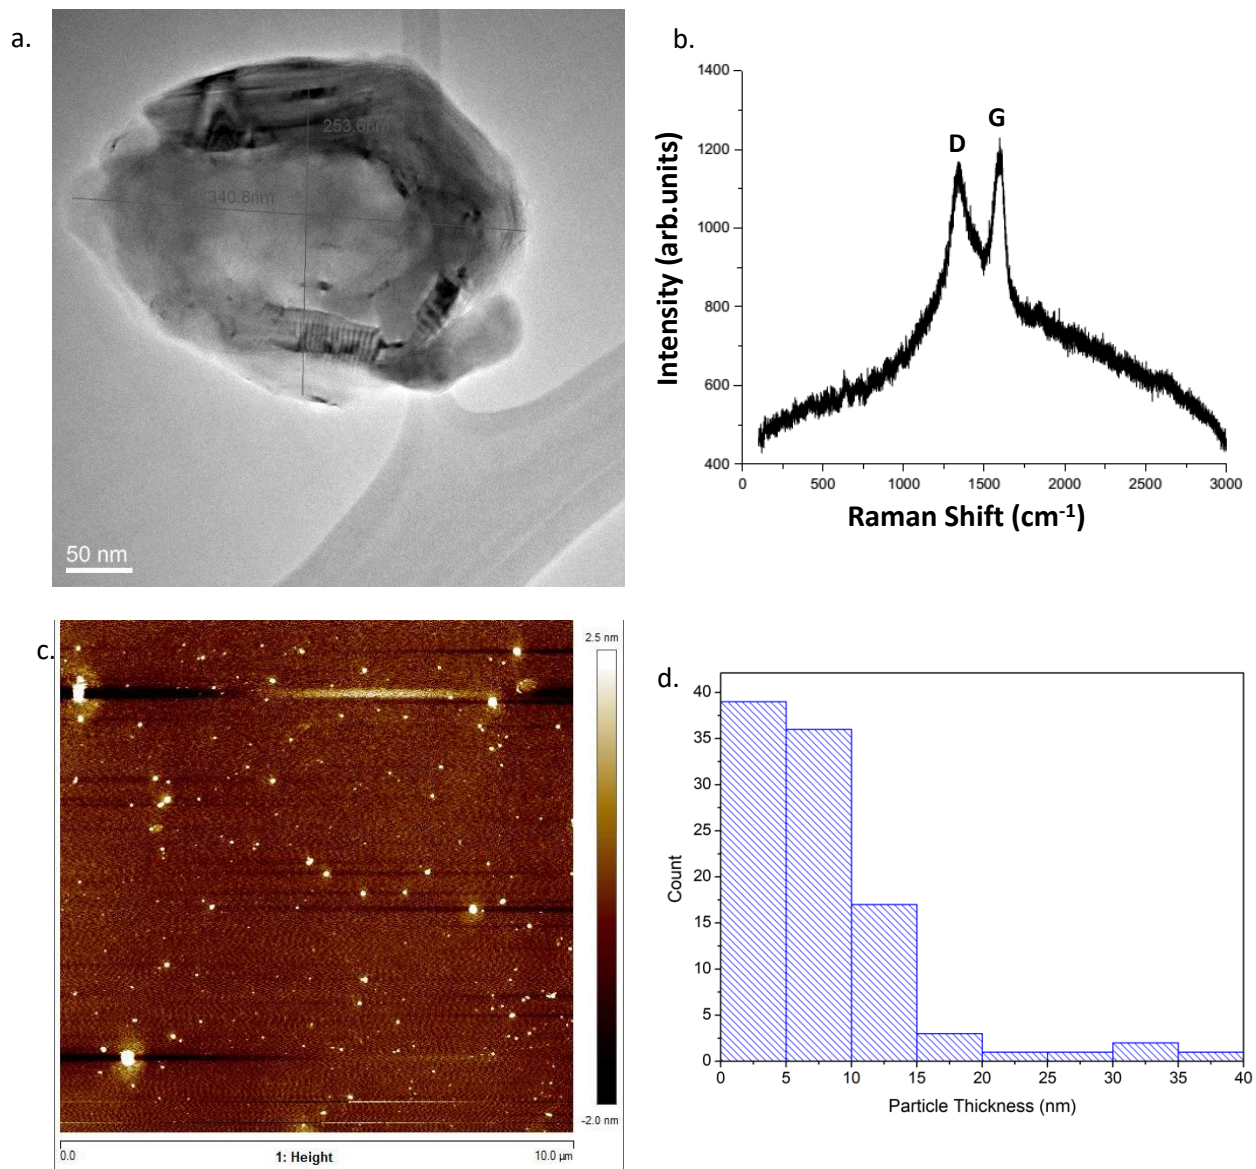

**Figure S10.** Graphite nanoparticle characterization: a) TEM for size and structure, b) Raman for types of carbon, and c,d) AFM for particle thickness.

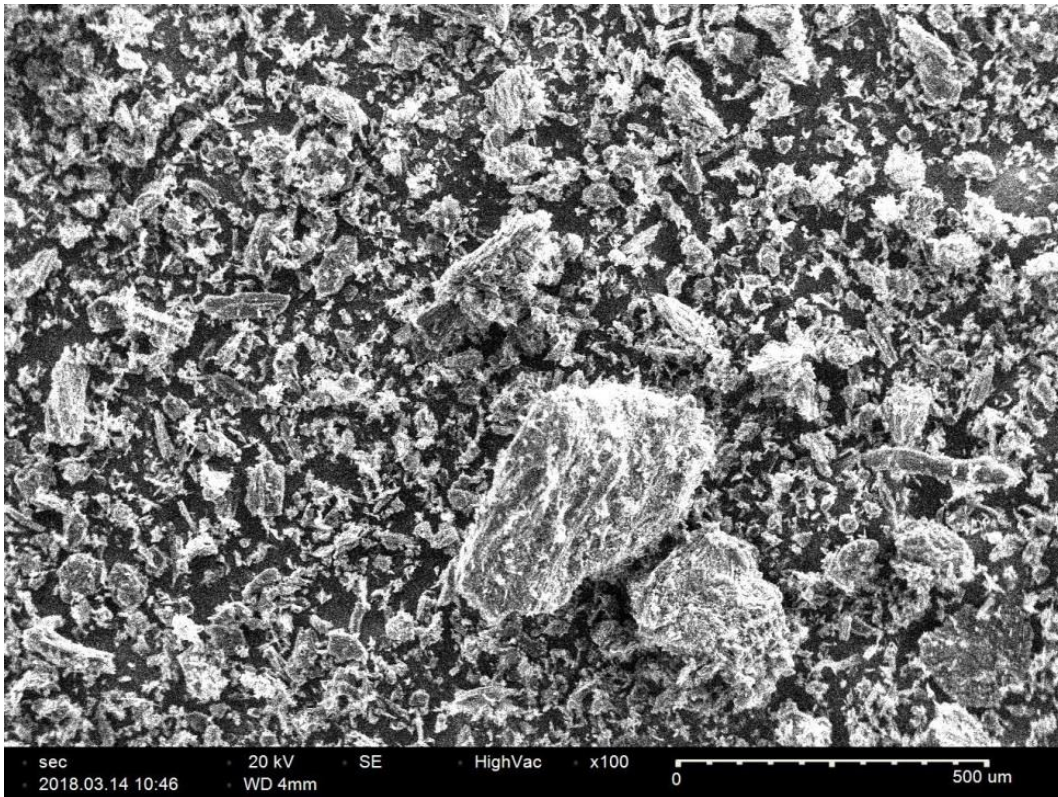

**Figure S11.** SEM image showing size distribution of carbon nanoparticles (CNPs). The image contains over 100 particles ranging in size from  $<100$  nm to  $>300$   $\mu$ m

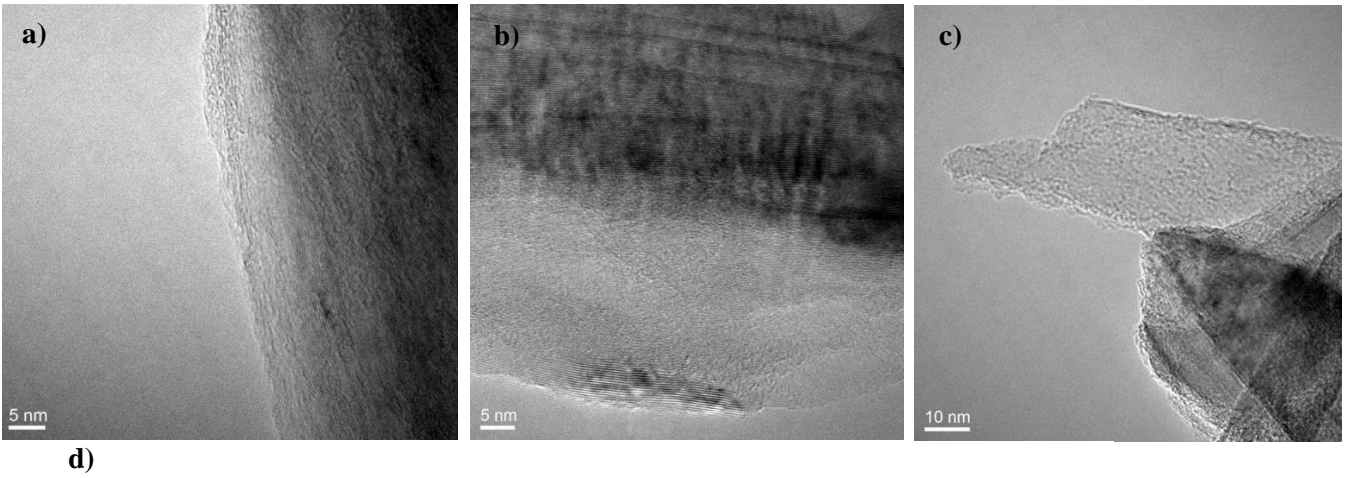

d)

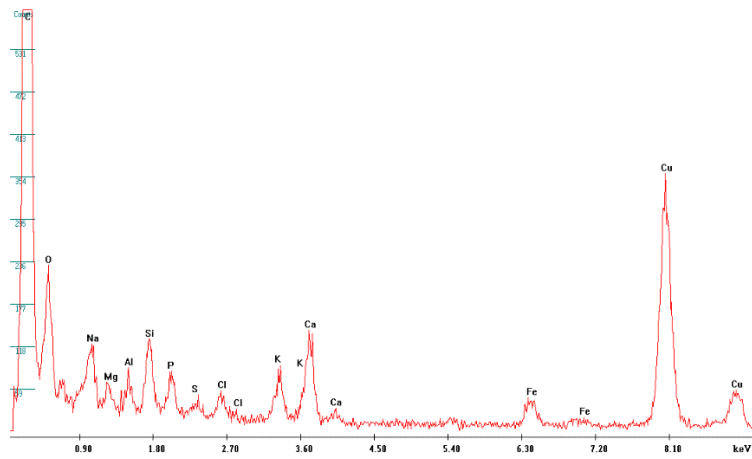

**Figure S12.** a-c) TEM images demonstrating graphite and amorphous carbon structures. d) elemental mapping of the CNP surface.

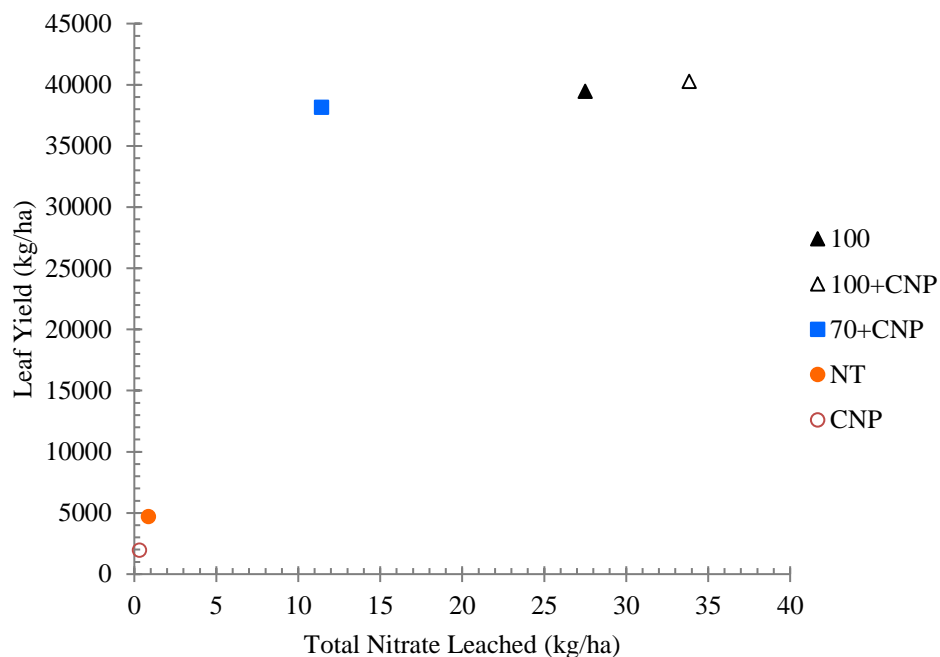

**Figure S13.** Trial 1 leaf yield (kg/ha) versus total nitrate leached (kg/ha). NPK fertilizer treatments are grouped by color, and an open symbol represents a treatment with CNP added.

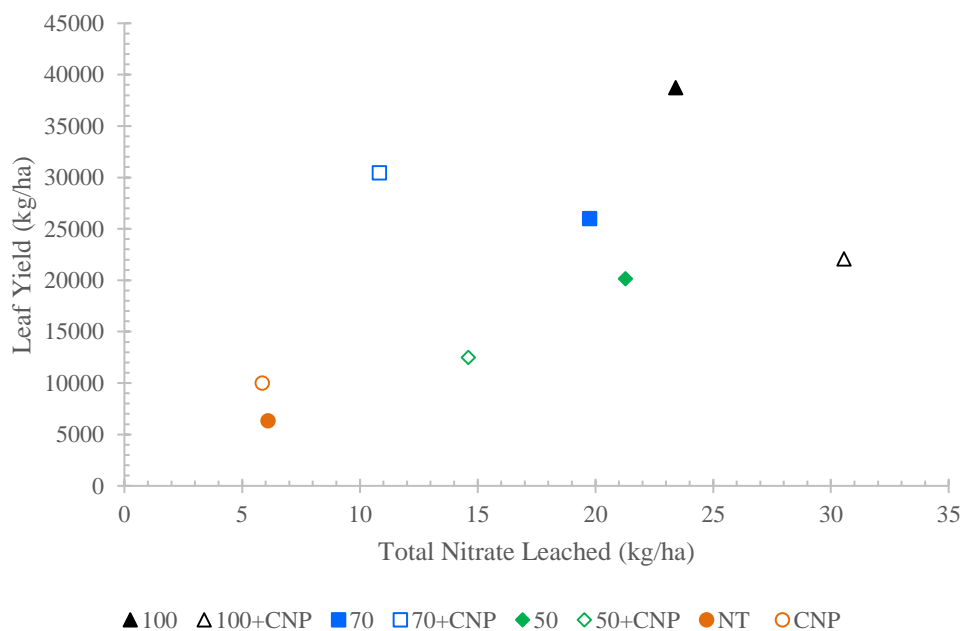

**Figure S14.** Trial 2 leaf yield (kg/ha) versus total nitrate leached (kg/ha). NPK fertilizer treatments are grouped by color and symbol, and an open symbol represents a treatment with CNP added.

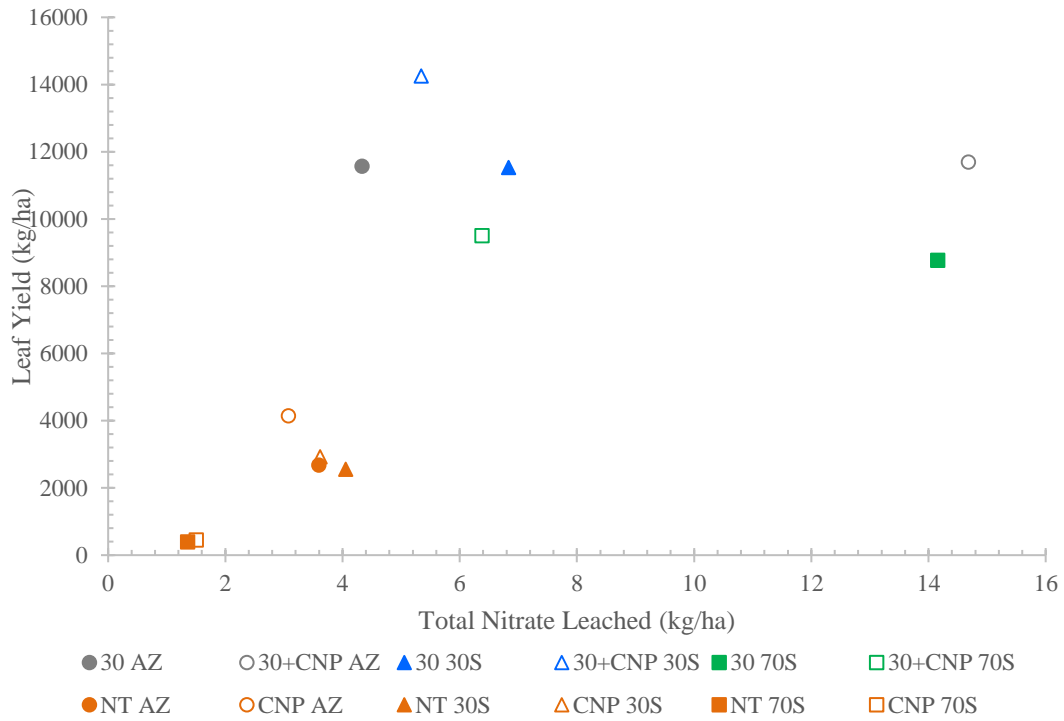

**Figure S15.** Trial 3 leaf yield (kg/ha) versus total nitrate leached (kg/ha). NPK fertilizer treatments are grouped by color and soil types are grouped by symbol. An open symbol represents a treatment with CNP added.

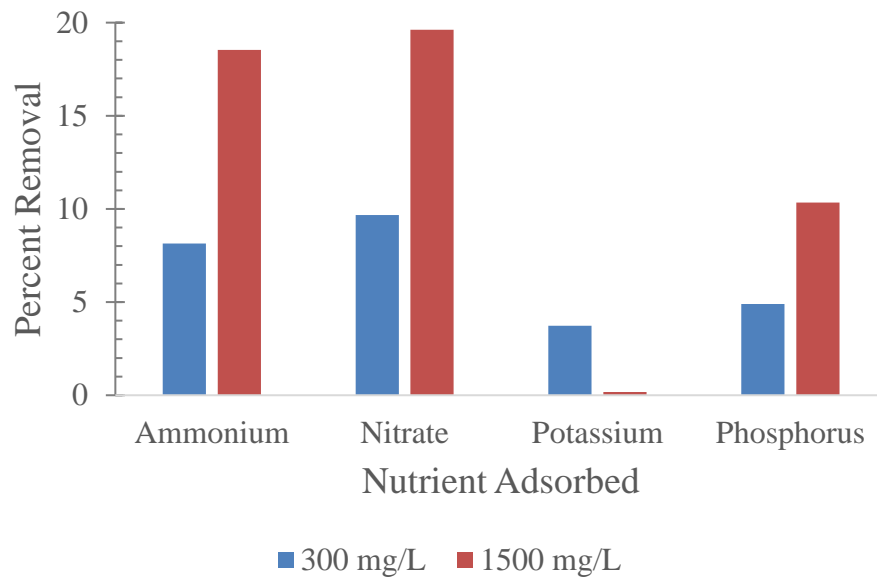

**Figure S16.** Adsorption study using CNPs at 300 and 1,500 mg/L mixing in a nutrient solution (ammonium, nitrate, potassium, and phosphate) for three days on an end-over-end shaker.



## References

1. T. Grant, The Randomized Complete Block Design (RCBD), <http://pbgworks.org/sites/pbgworks.org/files/RandomizedCompleteBlockDesignTutorial.pdf>, 2018).
